# Supplementary material
Source: PubMed Central journal article supplement (PMC5457332)
Supplement: NIHMS837424-supplement-1.pdf [file NIHMS837424-supplement-1.pdf]

## **Supplemental data for**

### **Bone marrow cell trafficking analyzed by $^{89}\text{Zr}$ -oxine positron emission tomography in a murine transplantation model**

Kingsley O. Asiedu, Sho Koyasu, Lawrence P. Szajek, Peter L. Choyke and Noriko Sato\*

\*Correspondence author. E-mail: saton@mail.nih.gov

#### **Supplemental Materials and Methods**

##### **Evaluation of free $^{89}\text{Zr}$ accumulation in the bone and prevention by deferoxamine**

Free  $^{89}\text{Zr}$  can be released from the cells died after the transfer and could be taken up by the hydroxyapatite of the bone (37), causing ambiguity of the  $^{89}\text{Zr}$  signal (labeled cells homed to the BM vs free  $^{89}\text{Zr}$ ). To evaluate the extent of free  $^{89}\text{Zr}$  accumulation in the bone, we used deferoxamine (DFO) to capture the free  $^{89}\text{Zr}$ , which is excreted from the kidney. We then compared the whole-body and bone/BM radioactivities with those of mice without DFO treatment. Two groups of mice received injections of  $^{89}\text{Zr}$ -oxine labeled BM cells ( $2.1 \times 10^7$  cells at  $8.8 \text{ kBq}/10^6$  cells), one of which received DFO ( $660 \mu\text{g}$ ) intramuscularly 15 min before and 1, 2, 3 and 4 h after cell transfer and twice daily for 7 days thereafter.

MicroPET/CT imager was used to acquire images and activities in the whole-body and the

BM/bone were quantified using VivoQuant software.

### **Evaluation of side effect by $^{89}\text{Zr}$ retention in the spine**

$^{89}\text{Zr}$  in 1 M oxalic acid (74 MBq) was neutralized using 2 M  $\text{Na}_2\text{CO}_3$ , and added 0.5 M 2-[4-(2-hydroxyethyl)piperazin-1-yl]ethanesulfonic acid (HEPES) and water to adjust to 1 ml, 0.15 M HEPES. To evaluate for potential toxicity induced by retention of  $^{89}\text{Zr}$  in the BM or bone, 92.5 kBq of neutralized  $^{89}\text{Zr}$  solution diluted in PBS was injected via the tail vein to have the  $^{89}\text{Zr}$  taken up by the bone (n=3). A group of mice also received DFO to clear the  $^{89}\text{Zr}$  from the kidney, preventing the uptake to the bone (n=3). The control group remained untreated (n=3).

## Supplemental Figures

### Figure S1

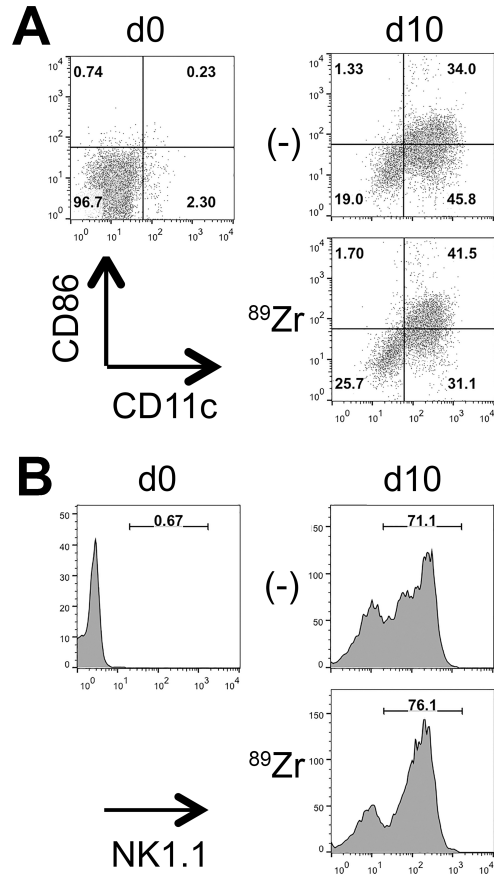

**Figure S1.  $^{89}\text{Zr}$ -labeled BM cells differentiate into DCs and NK/NK-T cells.**

$^{89}\text{Zr}$ -oxine labeled BM cells (22.2 kBq/ $10^6$  cells) cultured with 20 ng/ml GM-CSF (A) or 25 nM of IL-15 (B) differentiated into mature DCs (A) and NK/NK-T cells (B), respectively, after a 10 day-culture, in a comparable manner to the non-labeled cells (representative data of 4 independent experiments).

## Figure S2

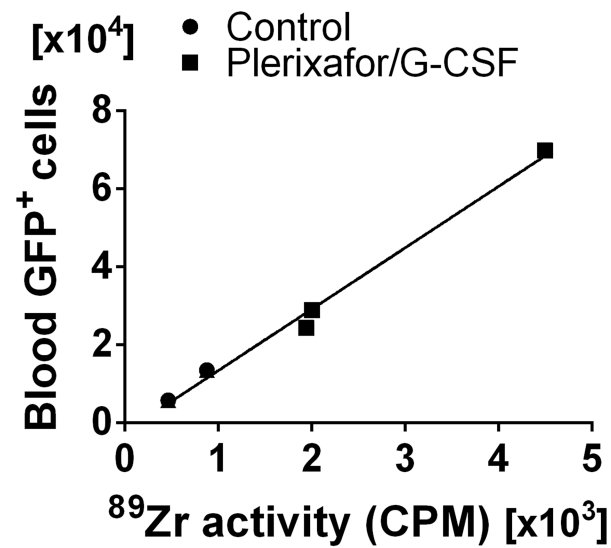

**Figure S2.  $^{89}\text{Zr}$  activity of blood correlate well with the number of  $^{89}\text{Zr}$ -labeled donor cells in the circulation.**

Twenty million GFP<sup>+</sup> BM cells labeled with  $^{89}\text{Zr}$ -oxine (3.7-11.1 kBq/ $10^6$  cells) were transplanted to two groups of mice, one of which received plerixafor/G-CSF injection at 3 h and 1 d. Blood was collected from the mice 2 h after the second mobilization treatment and span to isolate cells.  $^{89}\text{Zr}$  activity of cells in the blood counted by the  $\gamma$ -counter correlated well with GFP<sup>+</sup> cell number counted by flow cytometry analysis of the same sample.

Pearson correlation coefficient (r) was 0.9912.

# Figure S3

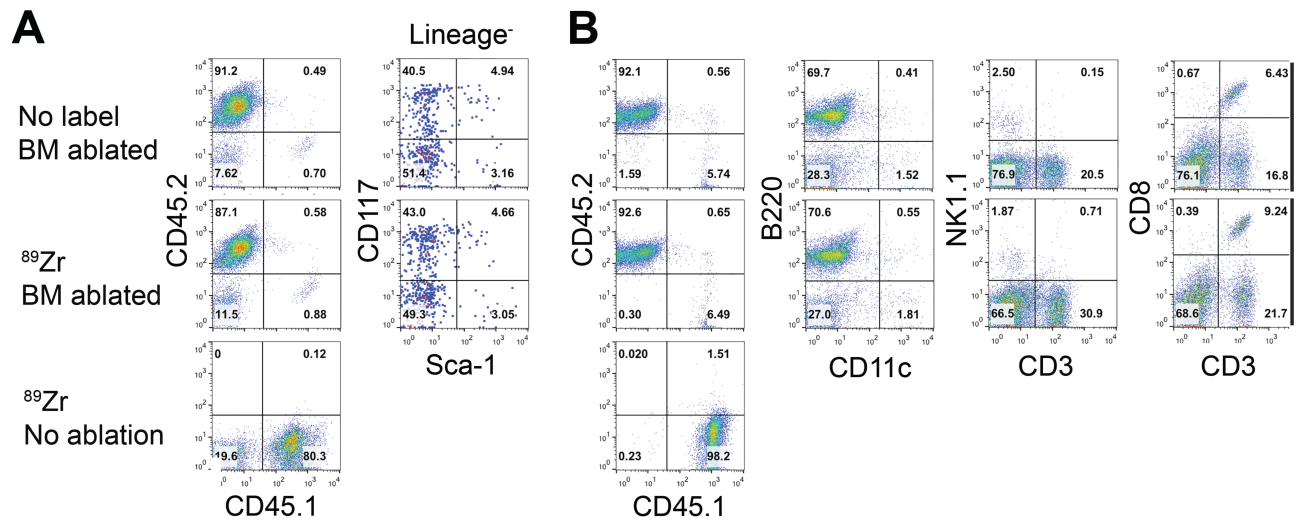

**Figure S3. Donor BM cells labeled with <sup>89</sup>Zr-oxine engraft and differentiate into mature immune cells in the recipient mice.**

Ten weeks following transfer of non-labeled or <sup>89</sup>Zr-labeled BM cells to mice with or without BM ablation, BM and splenocytes of the recipient were analyzed by flow cytometry.

A. CD45.2<sup>+</sup> donor derived cells reconstituted the BM of the BM-ablated hosts (CD45.1<sup>+</sup>), which did not occur in the non-BM ablated hosts. In BM-ablated hosts, <sup>89</sup>Zr-labeling of donor cells did not affect the engraftment of hematopoietic stem/progenitor cells (CD45.2<sup>+</sup>lineage marker-sca-1<sup>+</sup>CD117<sup>+</sup> cells) (Representative data of 3 experiments).

B. Analysis of splenocytes revealed that CD45.2<sup>+</sup> donor BM cells differentiated to mature immune cells such as DCs (CD11c<sup>+</sup>), B cells (B220<sup>+</sup>), NK cells (CD3<sup>-</sup>NK1.1<sup>+</sup>), and T cells (CD3<sup>+</sup>NK1.1<sup>-</sup>) in BM-ablated hosts but not in non-ablated recipient mice (Representative data of 3 experiments).

## Figure S4

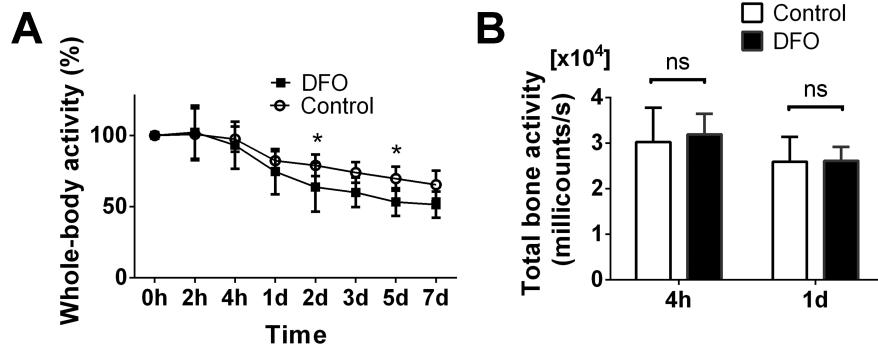

**Figure S4. Accumulation of free <sup>89</sup>Zr is observed from 2 days after the BM cell transfer.**

Mice (n=3) were administered with deferoxamine (DFO) chelator intramuscularly at a dose of 660  $\mu$ g 15 min prior to and at every hour for the first 4 hours after <sup>89</sup>Zr-oxine labeled BM cell transfer ( $2 \times 10^7$  cells at 8.8 kBq/ $10^6$  cells) and twice daily thereafter up to day 7. Serial microPET/CT images were acquired and <sup>89</sup>Zr activity in the whole-body and bone/BM was quantified. A. No significant enhancement of <sup>89</sup>Zr clearance by DFO (square) was observed up to 1 d. After 2 d, DFO induced excretion of approximately 15% of <sup>89</sup>Zr from the whole-body compared to control (circle), suggesting that no significant free <sup>89</sup>Zr was retained in the body even without the use of DFO until day 1. Each asterisk indicates statistical significance (\*: $P < 0.05$ , Two-way analysis of variance followed by Sidak's multiple comparisons test correction). B. <sup>89</sup>Zr activity in the bone/BM was similar between the two groups at 4 h and 1 d (both  $P = 0.8192$ , Unpaired two-tailed t-test).

## Figure S5

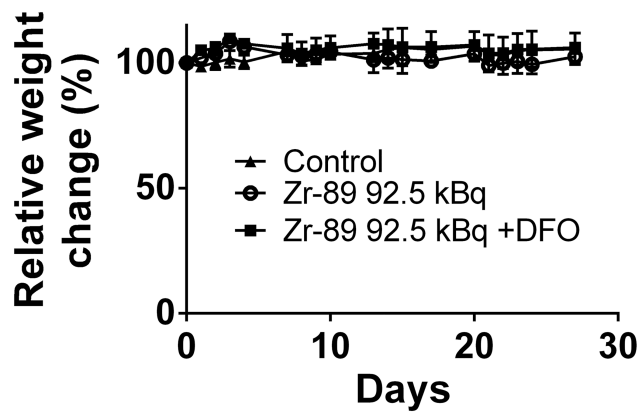

**Figure S5.  $^{89}\text{Zr}$  retention in the vertebra does not induce body weight loss**

Mice received injections of a high dose of free  $^{89}\text{Zr}$  (92.5 kBq) alone or in combination with DFO (n=3). Body weights were recorded for 27 days. No significant body-weight loss was observed in the experimental groups compared to the control ( $P = 0.3651$ , One-way analysis of variance followed by the Brown-Forsythe test correction).
